# Supplementary material for: Stable nanoconjugates of transferrin with alloyed quaternary nanocrystals Ag–In–Zn–S as a biological entity for tumor recognition
Source: Royal Society of Chemistry journal article supplement (doi:10.1039/c7nr07819f), 2017-12-08
Supplement: c7nr07819f1.pdf [file c7nr07819f1.pdf]

## *Supplementary Information*

*for*

# Stable nanoconjugate of transferrin with alloyed quaternary nanocrystals Ag-In-Zn-S as biological entity for tumor recognition

*Edyta Matysiak-Brynda,<sup>1</sup> Piotr Bujak,<sup>2</sup> Ewa Augustin,<sup>3</sup> Agata Kowalczyk,<sup>1</sup> Zofia Mazerska,<sup>3</sup>  
Adam Pron,<sup>2</sup> Anna M. Nowicka\*<sup>1</sup>*

<sup>1</sup>Faculty of Chemistry, University of Warsaw, Pasteura 1 Str., PL-02-093 Warsaw, Poland

<sup>2</sup>Faculty of Chemistry, Warsaw University of Technology, Noakowskiego 3 Str., 00-664  
Warsaw, Poland

<sup>3</sup>Gdańsk University of Technology, Chemical Faculty, Department of Pharmaceutical  
Technology and Biochemistry, Narutowicza 11/12 Str., 80-233 Gdańsk, Poland

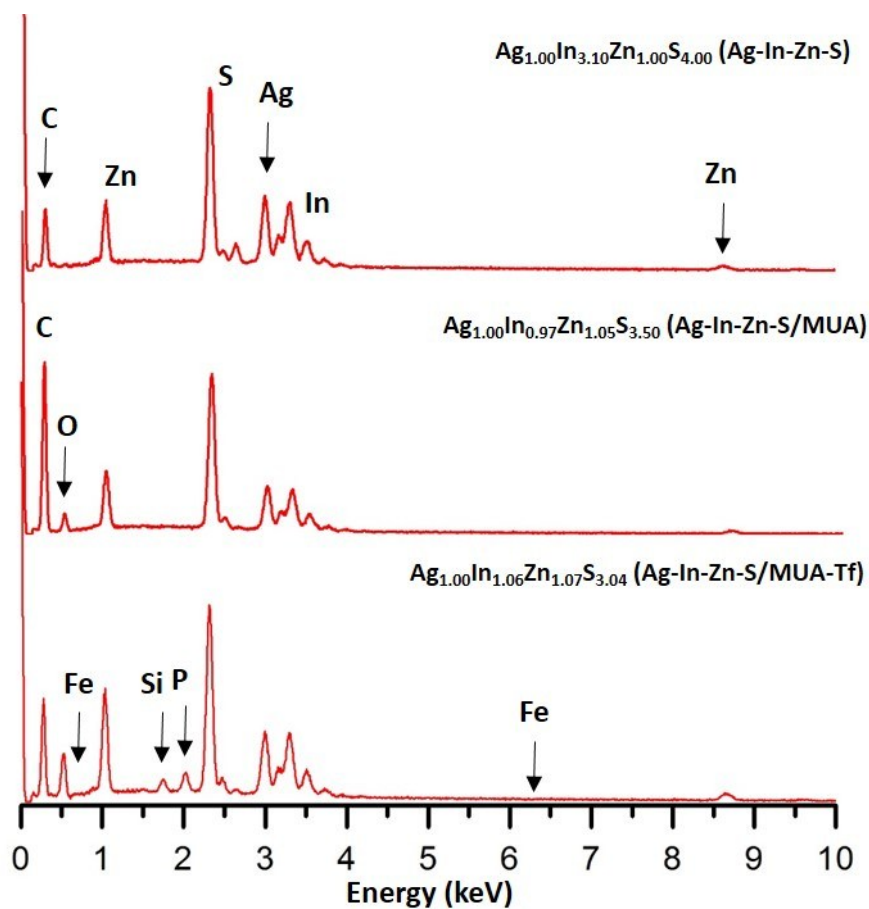

**Fig. S1.** Energy-dispersive spectra of Ag-In-Zn-S, Ag-In-Zn-S/MUA and Ag-In-Zn-S/MUA-Tf nanocrystals.

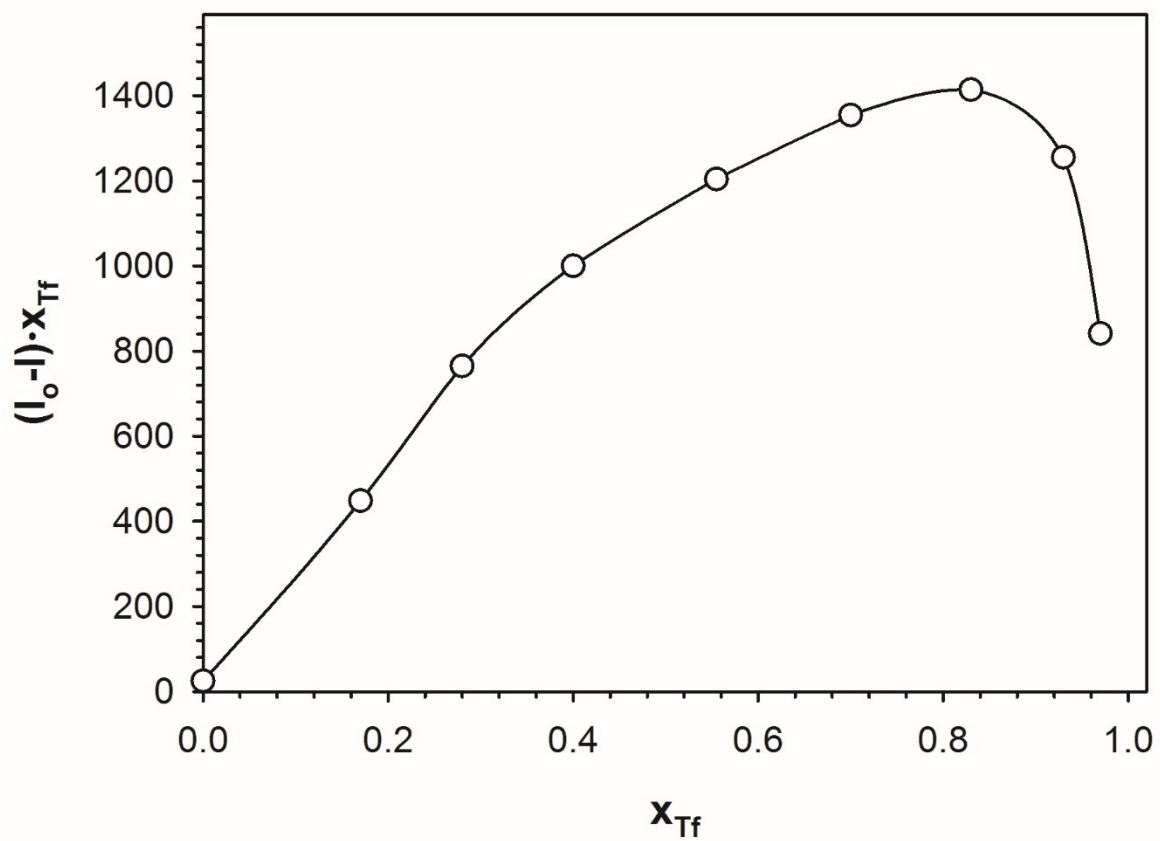

**Fig. S2.** Job plot for coordination of Tf to QD as measured by fluorescence spectroscopy.

### The number of transferrin units in Ag-In-Zn-S/MUA-Tf

The total number of atoms (N) in the average-radius ( $r = 2.88$  nm) Ag-In-Zn-S/MUA-Tf calculated as follows:

$$V_1 = \frac{4}{3} \times \pi \times (r)^3 = 1.00 \times 10^{-25} \text{ m}^3, V_2 = a^3 = 1.57 \times 10^{-28} \text{ m}^3$$

$$V_1/V_2 = 635, \text{CN} = 4, \text{N} = 2540$$

where  $V_1$  is the volume of the nanocrystals,  $V_2$  is the volume of the elementary cell ( $a = 5.4$  Å is the lattice constant) and CN is the coordination number.

To calculate the number of iron-saturated transferrin units in Ag-In-Zn-S/MUA-Tf the relationship between the molar ratio of elements ( $\text{Ag/Fe} = 1.000/0.025$ ) in the hybrid (from EDS) was used, taking into account the total number of Ag atoms in an individual nanocrystal *i.e.*:

An average nanocrystal of the following stoichiometry  $\text{Ag}_{1.0}\text{In}_{1.0}\text{Zn}_{1.0}\text{S}_{3.0}$  contains 2540 atoms. The Ag share is therefore  $2540/(1+1+1+3) = 423$  ( $\text{Ag}_{423}\text{In}_{423}\text{Zn}_{423}\text{S}_{1269}$ ),  $\text{Ag/Fe} = 1.000/0.025$ , the number of iron atoms in Ag-In-Zn-S/MUA-TF =  $423 \times 0.025 \approx 10$ , the number of transferrin units in Ag-In-Zn-S/MUA-Tf =  $10/2 = 5$ .

### The molecular mass of Ag-In-Zn-S/MUA nanocrystals

The molecular mass of inorganic core  $\text{Ag}_{423}\text{In}_{423}\text{Zn}_{423}\text{S}_{1269}$  is 162554 g/mol. The total molecular mass of Ag-In-Zn-S/MUA nanocrystals calculated as follows:  $(162554 \times 100)/24.8 = 653878$  g/mol where 24.8 is the mole percent of Ag+In+Zn+S in nanocrystals (from EDS).

### EDS analysis of transferrin-functionalized Ag-In-Zn-S nanocrystals

| Element | Atomic%          |
|---------|------------------|
| Ag L    | $3.95 \pm 0.47$  |
| In L    | $4.19 \pm 0.51$  |
| Zn K    | $4.23 \pm 0.39$  |
| S K     | $12.02 \pm 0.47$ |
| Fe K    | $0.10 \pm 0.04$  |
| C K     | $52.39 \pm 2.80$ |
| O K     | $21.31 \pm 1.66$ |
| Si K    | $0.68 \pm 0.06$  |

|     |                 |
|-----|-----------------|
| P K | $1.13 \pm 0.07$ |
|-----|-----------------|

**Calculations of maximal mass of DOX per 1 g of QD and 1 g of nanoconjugate Tf-QD:**

| <b>Diameters determined from dynamic light scattering measurements</b>                                                                   |                                                    |                                                   |
|------------------------------------------------------------------------------------------------------------------------------------------|----------------------------------------------------|---------------------------------------------------|
| <b>QD</b>                                                                                                                                | <b>DOX</b>                                         | <b>Tf-QD</b>                                      |
| $\phi_{\text{QD}} = 9.1 \cdot 10^{-9} \text{ m}$                                                                                         | $\phi_{\text{QD}}^* = 1.5 \cdot 10^{-9} \text{ m}$ | $\phi_{\text{QD}} = 12.8 \cdot 10^{-9} \text{ m}$ |
| $r_{\text{QD}} = 4.55 \cdot 10^{-9} \text{ m}$                                                                                           | $r_{\text{QD}} = 0.75 \cdot 10^{-9} \text{ m}$     | $r_{\text{QD}} = 6.4 \cdot 10^{-9} \text{ m}$     |
| *the diameter of doxorubicin was determined with the help of the ChemSketch program where it was assumed that the molecules are circular |                                                    |                                                   |

$$S_{\text{QD}} = 4\pi r_{\text{QD}}^2 = 4 \cdot 3.14 \cdot (4.55 \cdot 10^{-9})^2 = 2.60 \cdot 10^{-16} \text{ m}^2$$

$$S_{\text{DOX}} = \pi r_{\text{DOX}}^2 = 3.14 \cdot (0.75 \cdot 10^{-9})^2 = 1.77 \cdot 10^{-18} \text{ m}^2$$

It was assumed that DOX molecules on the surface of QD are 2D close packed, and its maximal number per one QD molecule is:

$$\frac{S_{\text{QD}}}{S_{\text{DOX}}} = 144 \text{ molecules}$$

Since the 1 mol of doxorubicin ( $579.98 \text{ g} \cdot \text{mol}^{-1}$ ) contains  $6.023 \cdot 10^{23}$  molecules, 144 molecules of DOX correspond to the mass  $1.39 \cdot 10^{-19} \text{ g}$  DOX per one QD molecule. Taking into account the composition of QD:  $\text{Ag}_{1.00}\text{In}_{3.10}\text{Zn}_{1.00}\text{S}_{4.00}$ , the density of QD determined on the basis of density of its components is  $5.2 \text{ g} \cdot \text{cm}^{-3}$ , so the volume of 1 g of QD equals  $0.192 \text{ cm}^3$  and the volume of a single QD molecule ( $V_{\text{QD}}$ ) is  $3.94 \cdot 10^{-19} \text{ cm}^3$ ; thus, the number of QD in 1 g is  $4.87 \cdot 10^{17}$ .

$$V_{\text{QD}} = \frac{4}{3} \pi r^3 = \frac{4}{3} \cdot 3.14 \cdot (4.55 \cdot 10^{-9})^3 = 3.94 \cdot 10^{-25} \text{ m}^3 = 3.94 \cdot 10^{-19} \text{ cm}^3$$

So maximal mass of DOX per 1 g of QD equals:  $1.39 \cdot 10^{-19} \cdot 4.87 \cdot 10^{17} = 68 \text{ mg DOX}$ .

In the case of attachment of DOX to nanoconjugate Tf-QD the maximal mass of DOX anchored to 1 g is 0.136 g, according to the following calculations:

$$S_{\text{Tf-QD}} = 4\pi r_{\text{QD}}^2 = 4 \cdot 3.14 \cdot (6.4 \cdot 10^{-9})^2 = 5.14 \cdot 10^{-16} \text{ m}^2$$

$$S_{\text{DOX}} = \pi r_{\text{DOX}}^2 = 3.14 \cdot (0.75 \cdot 10^{-9})^2 = 1.77 \cdot 10^{-18} \text{ m}^2$$

The maximal number of DOX per one molecule of nanoconjugate Tf-QD is:

$$\frac{S_{\text{Tf-QD}}}{S_{\text{DOX}}} = 290 \text{ molecules}$$

Since the 1 mol DOX ( $579.98 \text{ g} \cdot \text{mol}^{-1}$ ) contains  $6.023 \cdot 10^{23}$  molecules, 290 molecules of DOX correspond to the mass  $2.80 \cdot 10^{-19} \text{ g}$  DOX per one molecule of nanoconjugate Tf-QD. Including

the number of Tf-QD in 1 g the maximal mass of DOX per 1 g of nanoconjugate Tf-QD equals:  
136 mg DOX.
